# Supplementary material for: IL-33 and Soluble ST2 Are Associated With Recurrent Spontaneous Abortion in Early Pregnancy
Source: Front Physiol. 2022 Jan 13;12:789829. doi: 10.3389/fphys.2021.789829 (PMC8793670; doi:10.3389/fphys.2021.789829)
Supplement: Supplementary file 1 [file Table_1.XLSX]

## Sheet: Sheet 1
		Normal group											RSA group
		Non-pregnancy					Pregnancy						Non-pregnancy					Pregnancy
	#	Age(year)	Gestational week age at serum collection	# of miscarriage	Lung disease	Cardiovascular disease	Age(year)	Gestational week age at serum collection	# of miscarriage	Lung disease	Cardiovascular disease	Live birth	Age(year)	Gestational week age at serum collection	# of miscarriage	Lung disease	Cardiovascular disease	Age(year)	Gestational week age at serum collection	# of miscarriage	Lung disease	Cardiovascular disease	Live birth
	1	24	N/A	0	No	No	30	6	0	No	No	Yes	34	N/A	5	No	No	31	10	3	No	No	Yes
	2	32		0	No	No	41	7	0	No	No	Yes	46		5	No	No	34	10	3	No	No	No
	3	39		0	No	No	25	N/A	0	No	No	Yes	30		4	No	No	36	9	4	No	No	No
	4	25		0	No	No	40	8	0	No	No	Yes	35		14	No	No	29	7	3	No	No	Yes
	5	29		0	No	No	27	N/A	0	No	No	Yes	30		2	No	No	28	10	2	No	No	Yes
	6	26		0	No	No	27	7	0	No	No	Yes	28		3	No	No	32	9	2	No	No	No
	7	37		0	No	No	45	8	0	No	No	Yes						27	11	2	No	No	Yes
	8	32		0	No	No	32	6	0	No	No	Yes						36	8	3	No	No	Yes
	9	30		0	No	No	39	7	0	No	No	Yes						31	8	2	No	No	Yes
	10	27		0	No	No	34	7	0	No	No	Yes						35	13	3	No	No	Yes
	11	27		0	No	No	33	7	0	No	No	Yes						31	30	4	No	No	Yes
	12	34		0	No	No	33	6	0	No	No	Yes						32	18	2	No	No	Yes
	13	28		0	No	No	25	8	0	No	No	Yes						32	14	2	No	No	Yes
	14	27		0	No	No	28	11	0	No	No	Yes						28	14	2	No	No	Yes
	15	26		0	No	No	33	12	0	No	No	Yes						32	14	3	No	No	Yes
	16	33		0	No	No	29	12	0	No	No	Yes						31	9	4	No	No	Yes
	17	35		0	No	No	35	N/A	0	No	No	Yes						38	11	3	No	No	Yes
	18	36		0	No	No	30	12	0	No	No	Yes						30	14	2	No	No	Yes
	19	31		0	No	No	27	12	0	No	No	Yes						33	12	2	No	No	No
	20						30	12	0	No	No	Yes						44	7	5	No	No	No
	21						26	14	0	No	No	Yes						48	24	3	No	No	No
	22						32	12	0	No	No	Yes						30	7	2	No	No	Yes
	23						26	12	0	No	No	Yes						30	14	3	No	No	Yes
	24						30	12	0	No	No	Yes						31	15	2	No	No	Yes
	25						41	13	0	No	No	Yes						42	14	4	No	No	Yes
	26						34	13	0	No	No	Yes						28	15	2	No	No	No
	27						29	12	0	No	No	Yes						26	7	5	No	No	Yes
	28						31	12	0	No	No	Yes
